# Supplementary material
Source: publisher figshare collection journal article supplement (https://acs.figshare.com/ndownloader/files/4601131)
Supplement: Supplementary file 1 [file 4601131]

 
data_ab0641 
 
_audit_creation_method            SHELXL-97 
_chemical_name_systematic 
; 
 ? 
; 
_chemical_name_common             ? 
_chemical_melting_point           ? 
_chemical_formula_moiety          ? 
_chemical_formula_sum 
 'C15 H29 N O4' 
_chemical_formula_weight          287.39 
 
loop_ 
 _atom_type_symbol 
 _atom_type_description 
 _atom_type_scat_dispersion_real 
 _atom_type_scat_dispersion_imag 
 _atom_type_scat_source 
 'C'  'C'   0.0033   0.0016 
 'International Tables Vol C Tables 4.2.6.8 and 6.1.1.4' 
 'H'  'H'   0.0000   0.0000 
 'International Tables Vol C Tables 4.2.6.8 and 6.1.1.4' 
 'N'  'N'   0.0061   0.0033 
 'International Tables Vol C Tables 4.2.6.8 and 6.1.1.4' 
 'O'  'O'   0.0106   0.0060 
 'International Tables Vol C Tables 4.2.6.8 and 6.1.1.4' 
 
_symmetry_cell_setting            'MONOCLINIC' 
_symmetry_space_group_name_H-M    'P 2(1)/c' 
 
loop_ 
 _symmetry_equiv_pos_as_xyz 
 'x, y, z' 
 '-x, y+1/2, -z+1/2' 
 '-x, -y, -z' 
 'x, -y-1/2, z-1/2' 
 
_cell_length_a                    15.6598(14) 
_cell_length_b                    9.5603(9) 
_cell_length_c                    12.3466(11) 
_cell_angle_alpha                 90.00 
_cell_angle_beta                  108.977(2) 
_cell_angle_gamma                 90.00 
_cell_volume                      1748.0(3) 
_cell_formula_units_Z             4 
_cell_measurement_temperature     273(2) 
_cell_measurement_reflns_used     ? 
_cell_measurement_theta_min       ? 
_cell_measurement_theta_max       ? 
 
_exptl_crystal_description        'PLATE' 
_exptl_crystal_colour             'COLOURLESS' 
_exptl_crystal_size_max           0.95 
_exptl_crystal_size_mid           0.67 
_exptl_crystal_size_min           0.14 
_exptl_crystal_density_meas       ? 
_exptl_crystal_density_diffrn     1.092 
_exptl_crystal_density_method     'not measured' 
_exptl_crystal_F_000              632 
_exptl_absorpt_coefficient_mu     0.078 
_exptl_absorpt_correction_type    'MULTI-SCAN' 
_exptl_absorpt_correction_T_min   0.9297 
_exptl_absorpt_correction_T_max   0.9892 
_exptl_absorpt_process_details    'SADABS' 
 
_exptl_special_details 
; 
 ? 
; 
 
_diffrn_ambient_temperature       273(2) 
_diffrn_radiation_wavelength      0.71073 
_diffrn_radiation_type            MoK\a 
_diffrn_radiation_source          'fine-focus sealed tube' 
_diffrn_radiation_monochromator   graphite 
_diffrn_measurement_device_type   'BRUKER CCD AREA DETECTOR' 
_diffrn_measurement_method        'PHI-OMEGA SCAN' 
_diffrn_detector_area_resol_mean  3 
_diffrn_standards_number          ? 
_diffrn_standards_interval_count  ? 
_diffrn_standards_interval_time   ? 
_diffrn_standards_decay_%         ? 
_diffrn_reflns_number             8559 
_diffrn_reflns_av_R_equivalents   0.0168 
_diffrn_reflns_av_sigmaI/netI     0.0191 
_diffrn_reflns_limit_h_min        -11 
_diffrn_reflns_limit_h_max        18 
_diffrn_reflns_limit_k_min        -11 
_diffrn_reflns_limit_k_max        9 
_diffrn_reflns_limit_l_min        -14 
_diffrn_reflns_limit_l_max        14 
_diffrn_reflns_theta_min          2.54 
_diffrn_reflns_theta_max          25.00 
_reflns_number_total              3078 
_reflns_number_gt                 2487 
_reflns_threshold_expression      >2sigma(I) 
 
_computing_data_collection        'BRUKER AXS SMART 3' 
_computing_cell_refinement        'BRUKER AXS SMART 3' 
_computing_data_reduction         'BRUKER AXS SAINT' 
_computing_structure_solution     'SHELXS-97 (Sheldrick, 1990)' 
_computing_structure_refinement   'SHELXL-97 (Sheldrick, 1997)' 
_computing_molecular_graphics     'BRUKER SHELXTL' 
_computing_publication_material   'MERCURY 1.4' 

 
_refine_special_details 
; 
 Refinement of F^2^ against ALL reflections.  The weighted R-factor wR and 
 goodness of fit S are based on F^2^, conventional R-factors R are based 
 on F, with F set to zero for negative F^2^. The threshold expression of 
 F^2^ > 2sigma(F^2^) is used only for calculating R-factors(gt) etc. and is 
 not relevant to the choice of reflections for refinement.  R-factors based 
 on F^2^ are statistically about twice as large as those based on F, and R- 
 factors based on ALL data will be even larger. 
; 
 
_refine_ls_structure_factor_coef  Fsqd  
_refine_ls_matrix_type            full 
_refine_ls_weighting_scheme       calc  
_refine_ls_weighting_details 
 'calc w=1/[\s^2^(Fo^2^)+(0.0959P)^2^+0.8138P] where P=(Fo^2^+2Fc^2^)/3' 
_atom_sites_solution_primary      direct 
_atom_sites_solution_secondary    difmap 
_atom_sites_solution_hydrogens    geom 
_refine_ls_hydrogen_treatment     mixed 
_refine_ls_extinction_method      none 
_refine_ls_extinction_coef        ? 
_refine_ls_number_reflns          3078 
_refine_ls_number_parameters      195 
_refine_ls_number_restraints      0 
_refine_ls_R_factor_all           0.0782 
_refine_ls_R_factor_gt            0.0675 
_refine_ls_wR_factor_ref          0.1971 
_refine_ls_wR_factor_gt           0.1871 
_refine_ls_goodness_of_fit_ref    1.044 
_refine_ls_restrained_S_all       1.044 
_refine_ls_shift/su_max           0.000 
_refine_ls_shift/su_mean          0.000 
 
loop_ 
 _atom_site_label 
 _atom_site_type_symbol 
 _atom_site_fract_x 
 _atom_site_fract_y 
 _atom_site_fract_z 
 _atom_site_U_iso_or_equiv 
 _atom_site_adp_type 
 _atom_site_occupancy 
 _atom_site_symmetry_multiplicity 
 _atom_site_calc_flag 
 _atom_site_refinement_flags 
 _atom_site_disorder_assembly 
 _atom_site_disorder_group 
N1 N 0.98399(17) 0.7650(3) 1.04573(18) 0.0604(6) Uani 1 1 d . . . 
O1 O 0.08889(17) 0.5213(2) 0.41458(17) 0.1088(9) Uani 1 1 d . . . 
O2 O 0.04132(11) 0.57249(16) 0.23195(13) 0.0618(5) Uani 1 1 d . . . 
O3 O 0.11526(16) 0.8754(2) 0.45464(15) 0.0866(7) Uani 1 1 d . . . 
O4 O 0.07551(12) 0.89075(17) 0.26696(13) 0.0656(5) Uani 1 1 d . . . 
H4O H 0.0408 0.9505 0.2759 0.098 Uiso 1 1 calc R . . 
C1 C 0.09498(15) 0.5863(2) 0.33200(18) 0.0503(5) Uani 1 1 d . . . 
C1' C 0.90677(19) 0.7026(3) 0.9565(2) 0.0685(7) Uani 1 1 d . . . 
H1C H 0.8616 0.6746 0.9904 0.082 Uiso 1 1 calc R . . 
H1D H 0.9269 0.6191 0.9272 0.082 Uiso 1 1 calc R . . 
C2 C 0.11755(14) 0.8325(2) 0.36442(18) 0.0489(5) Uani 1 1 d . . . 
C2' C 0.86512(19) 0.7989(3) 0.8604(2) 0.0682(7) Uani 1 1 d . . . 
H2D H 0.9117 0.8298 0.8298 0.082 Uiso 1 1 calc R . . 
H2C H 0.8440 0.8808 0.8906 0.082 Uiso 1 1 calc R . . 
C3 C 0.16642(14) 0.7000(2) 0.35327(18) 0.0488(5) Uani 1 1 d . . . 
C3' C 0.78822(19) 0.7426(3) 0.7637(2) 0.0763(8) Uani 1 1 d . . . 
H3D H 0.8098 0.6640 0.7302 0.092 Uiso 1 1 calc R . . 
H3C H 0.7427 0.7074 0.7944 0.092 Uiso 1 1 calc R . . 
C4 C 0.22145(17) 0.7034(3) 0.2696(2) 0.0689(7) Uani 1 1 d . . . 
H4A H 0.2049 0.6309 0.2115 0.083 Uiso 1 1 calc R . . 
H4B H 0.2232 0.7945 0.2357 0.083 Uiso 1 1 calc R . . 
C4' C 0.7448(2) 0.8452(3) 0.6711(2) 0.0825(8) Uani 1 1 d . . . 
H4C H 0.7206 0.9207 0.7048 0.099 Uiso 1 1 calc R . . 
H4D H 0.7917 0.8849 0.6451 0.099 Uiso 1 1 calc R . . 
C5 C 0.3046(2) 0.6697(6) 0.3699(4) 0.1225(15) Uani 1 1 d . . . 
H5A H 0.3299 0.5787 0.3638 0.147 Uiso 1 1 calc R . . 
H5B H 0.3507 0.7415 0.3844 0.147 Uiso 1 1 calc R . . 
C5' C 0.6711(2) 0.7947(4) 0.5682(3) 0.0899(9) Uani 1 1 d . . . 
H5C H 0.6225 0.7585 0.5928 0.108 Uiso 1 1 calc R . . 
H5D H 0.6942 0.7176 0.5347 0.108 Uiso 1 1 calc R . . 
C6 C 0.25425(17) 0.6724(3) 0.4529(2) 0.0725(7) Uani 1 1 d . . . 
H6B H 0.2716 0.7486 0.5076 0.087 Uiso 1 1 calc R . . 
H6A H 0.2547 0.5838 0.4914 0.087 Uiso 1 1 calc R . . 
C6' C 0.6328(2) 0.9023(4) 0.4772(3) 0.0956(10) Uani 1 1 d . . . 
H6'1 H 0.6104 0.9792 0.5116 0.115 Uiso 1 1 calc R . . 
H6'2 H 0.6820 0.9386 0.4538 0.115 Uiso 1 1 calc R . . 
C7' C 0.5598(2) 0.8585(4) 0.3732(3) 0.1027(11) Uani 1 1 d . . . 
H7C H 0.5102 0.8237 0.3963 0.123 Uiso 1 1 calc R . . 
H7D H 0.5818 0.7809 0.3392 0.123 Uiso 1 1 calc R . . 
C8' C 0.5234(3) 0.9660(5) 0.2830(3) 0.1310(16) Uani 1 1 d . . . 
H8C H 0.5008 1.0434 0.3166 0.157 Uiso 1 1 calc R . . 
H8D H 0.5730 1.0014 0.2600 0.157 Uiso 1 1 calc R . . 
C9' C 0.4509(3) 0.9207(6) 0.1792(4) 0.164(2) Uani 1 1 d . . . 
H9D H 0.4702 0.8394 0.1478 0.246 Uiso 1 1 calc R . . 
H9E H 0.4373 0.9947 0.1236 0.246 Uiso 1 1 calc R . . 
H9C H 0.3978 0.8985 0.1985 0.246 Uiso 1 1 calc R . . 
H1NB H 0.966(2) 0.841(4) 1.069(3) 0.092(10) Uiso 1 1 d . . . 
H1NA H 1.0068(17) 0.705(3) 1.102(2) 0.060(7) Uiso 1 1 d . . . 
H1NC H 1.029(2) 0.781(3) 1.016(3) 0.096(11) Uiso 1 1 d . . . 
 
loop_ 
 _atom_site_aniso_label 
 _atom_site_aniso_U_11 
 _atom_site_aniso_U_22 
 _atom_site_aniso_U_33 
 _atom_site_aniso_U_23 
 _atom_site_aniso_U_13 
 _atom_site_aniso_U_12 
N1 0.0795(15) 0.0588(13) 0.0423(10) 0.0004(10) 0.0190(10) 0.0133(11) 
O1 0.135(2) 0.1038(17) 0.0617(11) 0.0268(11) -0.0030(12) -0.0630(15) 
O2 0.0711(10) 0.0513(9) 0.0530(9) 0.0025(7) 0.0063(8) -0.0129(8) 
O3 0.1271(17) 0.0793(13) 0.0587(11) 0.0025(9) 0.0374(11) 0.0321(12) 
O4 0.0799(12) 0.0522(10) 0.0571(10) -0.0006(7) 0.0117(8) 0.0168(8) 
C1 0.0589(13) 0.0409(11) 0.0494(12) 0.0037(9) 0.0154(10) -0.0008(9) 
C1' 0.0777(17) 0.0561(14) 0.0663(15) 0.0046(11) 0.0158(13) 0.0001(12) 
C2 0.0526(12) 0.0429(11) 0.0517(12) 0.0008(9) 0.0178(10) -0.0053(9) 
C2' 0.0839(18) 0.0604(15) 0.0542(13) 0.0043(11) 0.0140(13) -0.0069(13) 
C3 0.0475(11) 0.0452(11) 0.0525(12) 0.0012(9) 0.0145(9) -0.0003(9) 
C3' 0.0716(17) 0.0687(16) 0.0782(18) 0.0047(14) 0.0099(14) -0.0060(13) 
C4 0.0685(16) 0.0628(15) 0.0857(18) -0.0061(13) 0.0391(14) -0.0039(12) 
C4' 0.089(2) 0.0807(19) 0.0650(16) 0.0022(14) 0.0079(14) -0.0082(15) 
C5 0.0583(18) 0.180(4) 0.128(3) -0.019(3) 0.029(2) 0.009(2) 
C5' 0.0767(19) 0.090(2) 0.087(2) 0.0071(16) 0.0039(16) -0.0126(16) 
C6 0.0541(14) 0.0691(16) 0.0802(17) 0.0005(13) 0.0025(13) 0.0027(12) 
C6' 0.090(2) 0.101(2) 0.0790(19) 0.0063(17) 0.0043(17) -0.0061(18) 
C7' 0.077(2) 0.114(3) 0.098(2) 0.008(2) 0.0023(17) -0.0075(19) 
C8' 0.125(3) 0.137(4) 0.098(3) 0.024(3) -0.009(2) -0.004(3) 
C9' 0.142(4) 0.175(5) 0.121(4) 0.021(3) -0.031(3) 0.006(4) 
 
_geom_special_details 
; 
 All esds (except the esd in the dihedral angle between two l.s. planes) 
 are estimated using the full covariance matrix.  The cell esds are taken 
 into account individually in the estimation of esds in distances, angles 
 and torsion angles; correlations between esds in cell parameters are only 
 used when they are defined by crystal symmetry.  An approximate (isotropic) 
 treatment of cell esds is used for estimating esds involving l.s. planes. 
; 
 
loop_ 
 _geom_bond_atom_site_label_1 
 _geom_bond_atom_site_label_2 
 _geom_bond_distance 
 _geom_bond_site_symmetry_2 
 _geom_bond_publ_flag 
N1 C1' 1.472(3) . ? 
N1 H1NB 0.86(4) . ? 
N1 H1NA 0.88(3) . ? 
N1 H1NC 0.90(4) . ? 
O1 C1 1.224(3) . ? 
O2 C1 1.255(3) . ? 
O3 C2 1.199(3) . ? 
O4 C2 1.295(3) . ? 
O4 H4O 0.8200 . ? 
C1 C3 1.520(3) . ? 
C1' C2' 1.476(3) . ? 
C1' H1C 0.9700 . ? 
C1' H1D 0.9700 . ? 
C2 C3 1.509(3) . ? 
C2' C3' 1.493(4) . ? 
C2' H2D 0.9700 . ? 
C2' H2C 0.9700 . ? 
C3 C6 1.541(3) . ? 
C3 C4 1.546(3) . ? 
C3' C4' 1.492(4) . ? 
C3' H3D 0.9700 . ? 
C3' H3C 0.9700 . ? 
C4 C5 1.511(5) . ? 
C4 H4A 0.9700 . ? 
C4 H4B 0.9700 . ? 
C4' C5' 1.492(4) . ? 
C4' H4C 0.9700 . ? 
C4' H4D 0.9700 . ? 
C5 C6 1.483(5) . ? 
C5 H5A 0.9700 . ? 
C5 H5B 0.9700 . ? 
C5' C6' 1.497(4) . ? 
C5' H5C 0.9700 . ? 
C5' H5D 0.9700 . ? 
C6 H6B 0.9700 . ? 
C6 H6A 0.9700 . ? 
C6' C7' 1.476(4) . ? 
C6' H6'1 0.9700 . ? 
C6' H6'2 0.9700 . ? 
C7' C8' 1.486(5) . ? 
C7' H7C 0.9700 . ? 
C7' H7D 0.9700 . ? 
C8' C9' 1.475(6) . ? 
C8' H8C 0.9700 . ? 
C8' H8D 0.9700 . ? 
C9' H9D 0.9600 . ? 
C9' H9E 0.9600 . ? 
C9' H9C 0.9600 . ? 
 
loop_ 
 _geom_angle_atom_site_label_1 
 _geom_angle_atom_site_label_2 
 _geom_angle_atom_site_label_3 
 _geom_angle 
 _geom_angle_site_symmetry_1 
 _geom_angle_site_symmetry_3 
 _geom_angle_publ_flag 
C1' N1 H1NB 108(2) . . ? 
C1' N1 H1NA 110.5(16) . . ? 
H1NB N1 H1NA 112(3) . . ? 
C1' N1 H1NC 109(2) . . ? 
H1NB N1 H1NC 112(3) . . ? 
H1NA N1 H1NC 106(3) . . ? 
C2 O4 H4O 109.5 . . ? 
O1 C1 O2 123.9(2) . . ? 
O1 C1 C3 118.1(2) . . ? 
O2 C1 C3 117.70(18) . . ? 
N1 C1' C2' 112.9(2) . . ? 
N1 C1' H1C 109.0 . . ? 
C2' C1' H1C 109.0 . . ? 
N1 C1' H1D 109.0 . . ? 
C2' C1' H1D 109.0 . . ? 
H1C C1' H1D 107.8 . . ? 
O3 C2 O4 123.8(2) . . ? 
O3 C2 C3 122.8(2) . . ? 
O4 C2 C3 113.33(18) . . ? 
C1' C2' C3' 116.6(2) . . ? 
C1' C2' H2D 108.1 . . ? 
C3' C2' H2D 108.1 . . ? 
C1' C2' H2C 108.1 . . ? 
C3' C2' H2C 108.1 . . ? 
H2D C2' H2C 107.3 . . ? 
C2 C3 C1 104.45(17) . . ? 
C2 C3 C6 114.73(19) . . ? 
C1 C3 C6 115.53(19) . . ? 
C2 C3 C4 116.94(18) . . ? 
C1 C3 C4 115.98(19) . . ? 
C6 C3 C4 89.44(19) . . ? 
C4' C3' C2' 115.1(2) . . ? 
C4' C3' H3D 108.5 . . ? 
C2' C3' H3D 108.5 . . ? 
C4' C3' H3C 108.5 . . ? 
C2' C3' H3C 108.5 . . ? 
H3D C3' H3C 107.5 . . ? 
C5 C4 C3 88.1(2) . . ? 
C5 C4 H4A 114.0 . . ? 
C3 C4 H4A 114.0 . . ? 
C5 C4 H4B 114.0 . . ? 
C3 C4 H4B 114.0 . . ? 
H4A C4 H4B 111.2 . . ? 
C5' C4' C3' 118.3(3) . . ? 
C5' C4' H4C 107.7 . . ? 
C3' C4' H4C 107.7 . . ? 
C5' C4' H4D 107.7 . . ? 
C3' C4' H4D 107.7 . . ? 
H4C C4' H4D 107.1 . . ? 
C6 C5 C4 93.0(2) . . ? 
C6 C5 H5A 113.1 . . ? 
C4 C5 H5A 113.1 . . ? 
C6 C5 H5B 113.1 . . ? 
C4 C5 H5B 113.1 . . ? 
H5A C5 H5B 110.5 . . ? 
C4' C5' C6' 115.3(3) . . ? 
C4' C5' H5C 108.5 . . ? 
C6' C5' H5C 108.5 . . ? 
C4' C5' H5D 108.5 . . ? 
C6' C5' H5D 108.5 . . ? 
H5C C5' H5D 107.5 . . ? 
C5 C6 C3 89.3(2) . . ? 
C5 C6 H6B 113.8 . . ? 
C3 C6 H6B 113.8 . . ? 
C5 C6 H6A 113.8 . . ? 
C3 C6 H6A 113.8 . . ? 
H6B C6 H6A 111.0 . . ? 
C7' C6' C5' 117.8(3) . . ? 
C7' C6' H6'1 107.9 . . ? 
C5' C6' H6'1 107.9 . . ? 
C7' C6' H6'2 107.9 . . ? 
C5' C6' H6'2 107.9 . . ? 
H6'1 C6' H6'2 107.2 . . ? 
C6' C7' C8' 117.1(3) . . ? 
C6' C7' H7C 108.0 . . ? 
C8' C7' H7C 108.0 . . ? 
C6' C7' H7D 108.0 . . ? 
C8' C7' H7D 108.0 . . ? 
H7C C7' H7D 107.3 . . ? 
C9' C8' C7' 116.6(4) . . ? 
C9' C8' H8C 108.1 . . ? 
C7' C8' H8C 108.1 . . ? 
C9' C8' H8D 108.1 . . ? 
C7' C8' H8D 108.1 . . ? 
H8C C8' H8D 107.3 . . ? 
C8' C9' H9D 109.5 . . ? 
C8' C9' H9E 109.5 . . ? 
H9D C9' H9E 109.5 . . ? 
C8' C9' H9C 109.5 . . ? 
H9D C9' H9C 109.5 . . ? 
H9E C9' H9C 109.5 . . ? 
 
loop_ 
 _geom_hbond_atom_site_label_D 
 _geom_hbond_atom_site_label_H 
 _geom_hbond_atom_site_label_A 
 _geom_hbond_distance_DH 
 _geom_hbond_distance_HA 
 _geom_hbond_distance_DA 
 _geom_hbond_angle_DHA 
 _geom_hbond_site_symmetry_A 
O4 H4O O2  0.82 1.72 2.526(2) 169.5 2 
O4 H4O O1  0.82 2.65 3.075(3) 114.2 2 
N1 H1NB O1  0.86(4) 1.97(4) 2.812(3) 167(3) 2_656 
N1 H1NA O2  0.88(3) 1.97(3) 2.853(3) 172(2) 1_656 
N1 H1NC O3  0.90(4) 2.31(4) 2.966(3) 129(3) 4_676 
N1 H1NC O1  0.90(4) 2.60(4) 3.350(4) 140(3) 4_676 
 
_diffrn_measured_fraction_theta_max    0.999 
_diffrn_reflns_theta_full              25.00 
_diffrn_measured_fraction_theta_full   0.999 
_refine_diff_density_max    0.594 
_refine_diff_density_min   -0.368 
_refine_diff_density_rms    0.040 
